# Supplementary material for: Influence of the shape of a polyelectrolyte on its electrophoretic behavior
Source: Royal Society of Chemistry journal article supplement (doi:10.1039/c2sm25741f), 2012-01-01
Supplement: c2sm25741f.pdf [file c2sm25741f.pdf]

## Electronic Supplementary Information for “Importance of the Shape of a Polyelectrolyte on Its Electrophoretic Behavior”

Jyh-Ping Hsu,\* Chih-Yuan Lin, Li-Hsien Yeh, Sung-Hwa Lin

Department of Chemical Engineering, National Taiwan University, Taipei, Taiwan 10617

\* Corresponding author

---

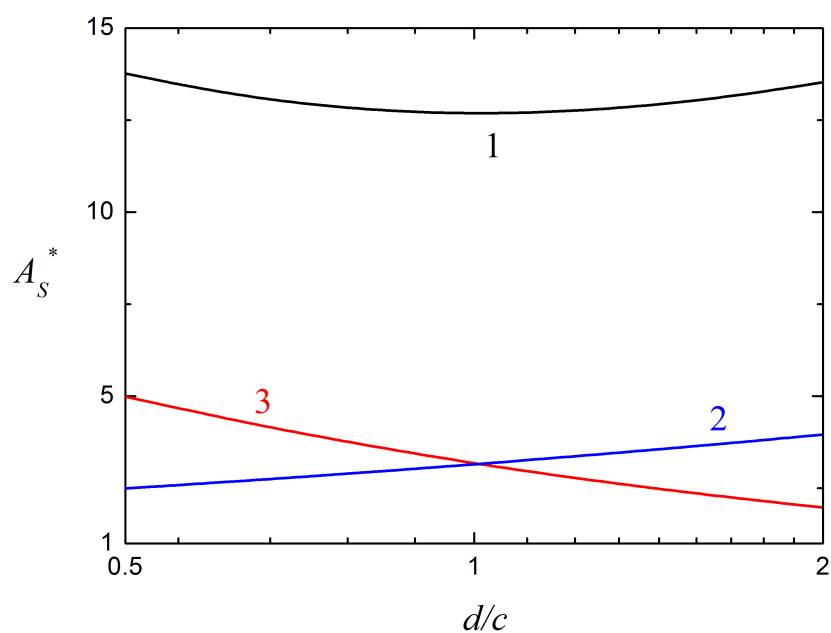

**Fig. S1.** Variations of the scaled area of a polyelectrolyte as a function of the aspect ratio ( $d/c$ ) at fixed polyelectrolyte volume. Curve 1: scaled surface area of the polyelectrolyte; 2: scaled area of its projection onto a plane parallel to the  $z$  axis; 3: scaled area of its projection onto a plane perpendicular to the  $z$  axis.

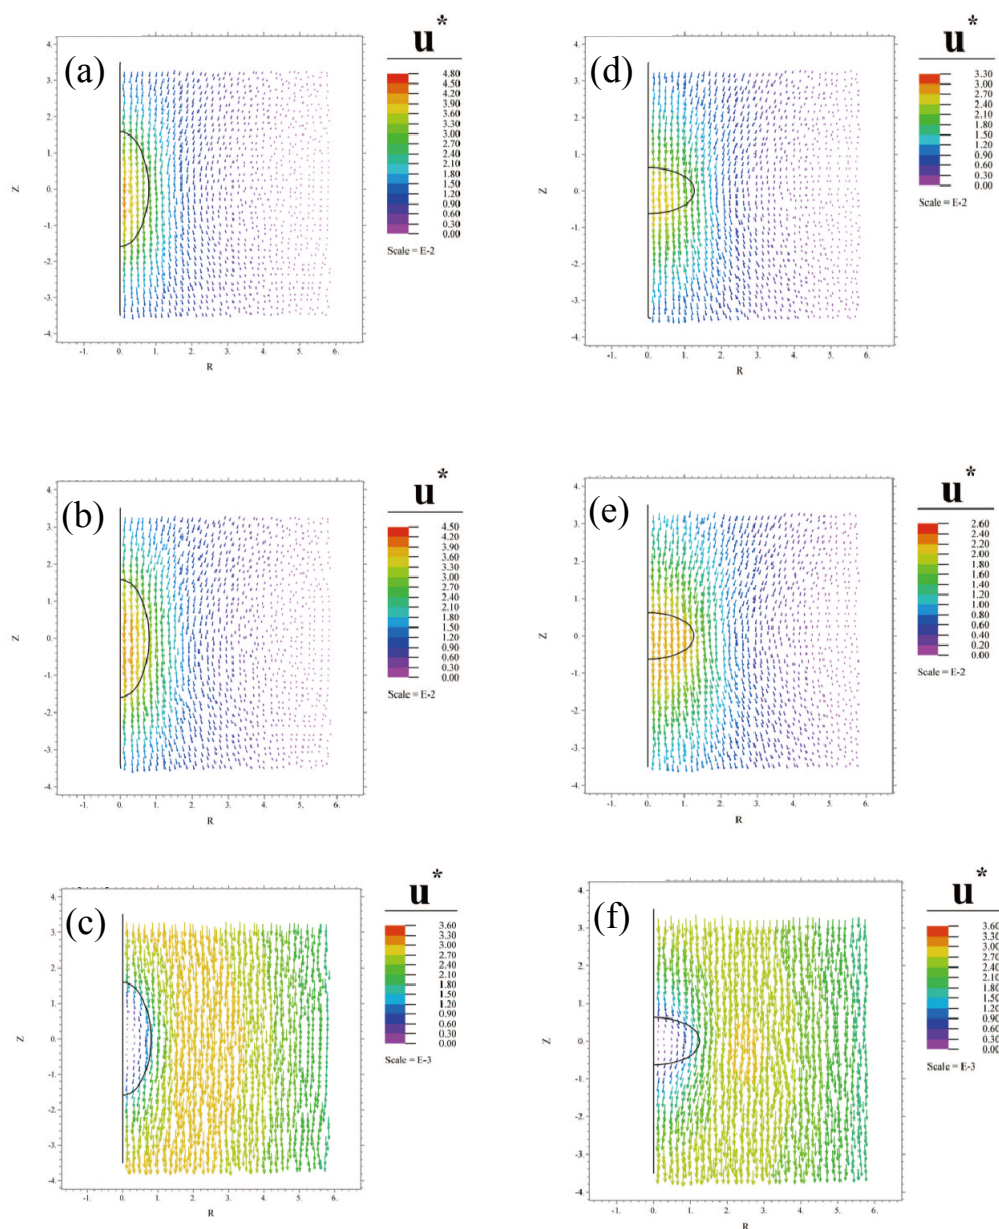

**Fig. S2.** Variations of the scaled flow field  $\mathbf{u}^*$  in sub-problem two on the half plane

$\theta = 0$  for various combinations of  $Q_{fix}$ ,  $\kappa a$ , and  $(d/c)$  at  $\lambda a = 2$ . (a)  $Q_{fix} = 50$ ,  $\kappa a = 5$ , and  $d/c = 2$ ; (b)  $Q_{fix} = 100$ ,  $\kappa a = 5$ , and  $d/c = 2$ ; (c)  $Q_{fix} = 100$ ,  $\kappa a = 0.2$ , and  $d/c = 2$ ; (d)  $Q_{fix} = 50$ ,  $\kappa a = 5$ , and  $d/c = 0.5$ ; (e)  $Q_{fix} = 100$ ,  $\kappa a = 5$ , and  $d/c = 0.5$ ; (f)  $Q_{fix} = 100$ ,  $\kappa a = 0.2$ , and  $d/c = 0.5$ .

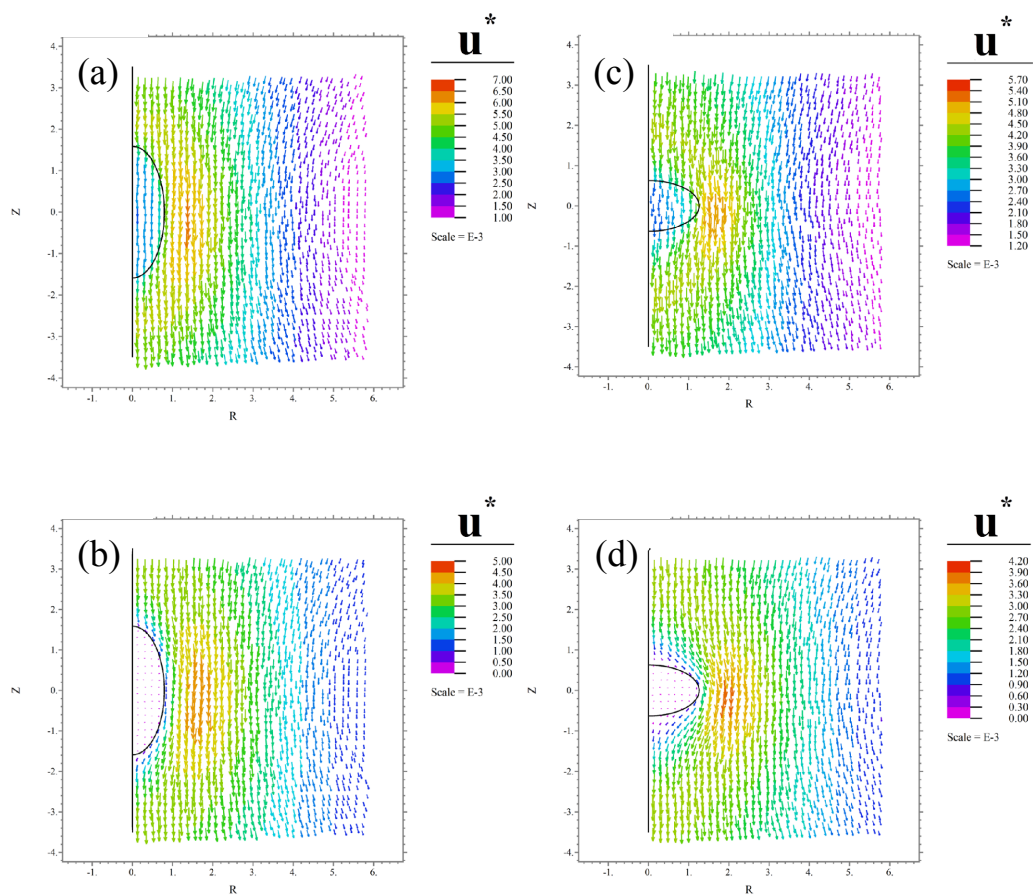

**Fig. S3.** Contours of the scaled velocity  $\mathbf{u}^*$  in sub-problem two on the half plane  $\theta = 0$  for various combinations of  $\lambda a$  and  $(d/c)$  at  $Q_{fix} = 25$  and  $\kappa a = 1$ . (a)  $\lambda a = 4$  and  $d/c=2$ ; (b)  $\lambda a = 20$  and  $d/c=2$ ; (c)  $\lambda a = 4$  and  $d/c=0.5$ ; (d)  $\lambda a = 20$  and  $d/c=0.5$ .

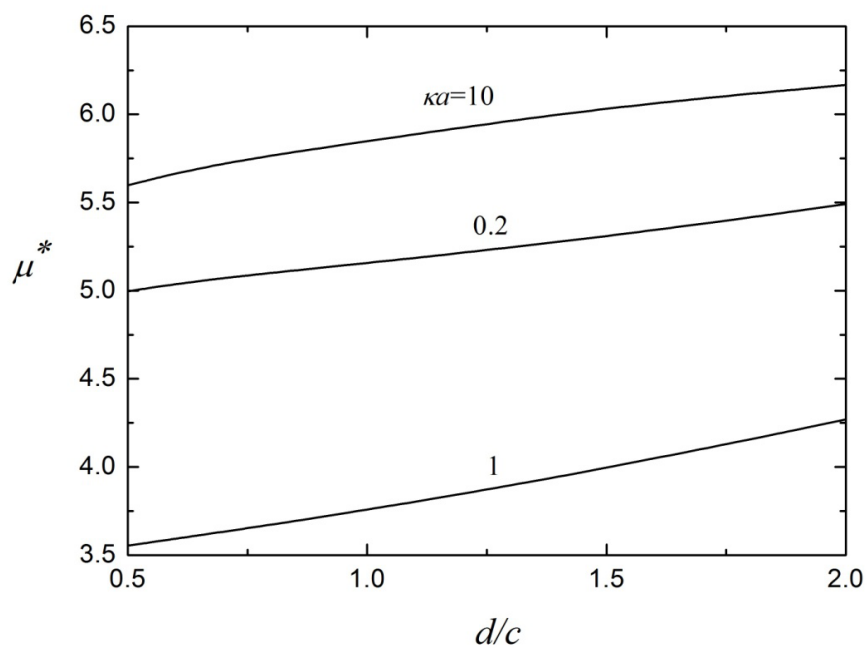

**Fig. S4.** Variations of the scaled electrophoretic mobility  $\mu^*$  as a function of the aspect ratio ( $d/c$ ) at various values of  $\kappa a$  for an ellipsoidal polyelectrolyte at  $Q_{fix} = 25$  and  $\lambda a = 2$ .
